# Virucidal activity of CPC-containing oral rinses against SARS-CoV-2 variants and are active in the presence of human saliva

Enya R Anderson<sup>1</sup>, Edward I Patterson<sup>1,2</sup>, Siobhan Richards<sup>1</sup>, Alison Green<sup>3</sup>, Sayandip Mukherjee<sup>4</sup>, Michael Hoptroff<sup>3\*</sup>, Grant L Hughes<sup>1\*</sup>

<sup>1</sup>Liverpool School of Tropical Medicine, Departments of Vector Biology and Tropical Disease Biology, Centre for Neglected Tropical Diseases, Liverpool, L3 5QA, K

<sup>2</sup>Brock University, Department of Biological Sciences, St. Catharines, L2S 3A1, Canada

<sup>3</sup>Unilever Research and Development, Port Sunlight, CH63 3JW, UK

<sup>4</sup>Unilever Research and Development Centre, Bangalore 560066, India

\* corresponding authors. [Michael.Hoptroff@Unilever.com](mailto:Michael.Hoptroff@Unilever.com), [Grant.Hughes@lstm.ac.uk](mailto:Grant.Hughes@lstm.ac.uk)

## Running title

Inactivation of SARS-CoV-2 with mouthwash.

## Keywords

SARS-CoV-2, COVID-19, Mouthwash, Saliva, Oral Hygiene

## Abstract

The role of human saliva in aerosol-based transmission of SARS-CoV-2 has highlighted the need to understand the potential of oral hygiene products to inactivate the virus. Here we examined the efficacy of mouthwashes containing cetylpyridinium chloride (CPC) or chlorhexidine (CHX) in inactivating SARS-CoV-2. After 30 seconds contact under standard aqueous conditions CPC mouthwashes achieved a  $\geq 4.0 \log_{10}$  PFU/mL reduction in SARS-CoV-2 (USA-WA1/2020) titres whereas comparable products containing CHX achieved  $< 2.0 \log_{10}$  PFU/mL reduction. Further testing with CPC mouthwashes demonstrated efficacy against multiple SARS-CoV-2 variants, with inactivation below the limit of detection observed against the Alpha (B.1.1.7), Beta (B.1.35.1) and Gamma (P.1) variants. Virucidal efficacy of CPC mouthwash was also observed in the presence of human saliva with the product delivering  $\geq 4.0 \log_{10}$  PFU/mL reduction in SARS-CoV-2 titres after 30 seconds providing additional evidence for the virucidal efficacy of CPC mouthwashes under simulated physiological conditions. Together these data suggest CPC-based mouthwashes are effective at inactivating SARS-CoV-2 and further supports the use of mouthwash to mitigate the risk of transmission during dentistry procedures.

## 37 Introduction

38 The high viral load of SARS-CoV-2 present in the saliva of infected individuals and their ease of  
 39 aerosolisation means that saliva is recognised as playing a key role in the transmission of SARS-CoV-2  
 40 [1-3]. The potential of the oral cavity to act as a viral reservoir is supported by the presence of the  
 41 angiotensin-converting enzyme 2 (ACE-2) receptor in oral gingival epithelia and salivary glands and  
 42 the infection of these tissues by SARS-CoV-2 *in vivo* [4], potentially aggravating systemic infection via  
 43 an oral-vasculo-pulmonary route [5].

44 The use of oral rinses or mouthwashes have been proposed by health organisations to mitigate  
 45 transmission of SARS-CoV-2 during dentistry procedures due to their demonstrated efficacy in  
 46 deactivating SARS-CoV-2 *in vitro* and *in vivo* [6-8]. The antimicrobial action of a mouthwash is  
 47 dependent on a combination of the active ingredients, their intrinsic efficacy, and their bioavailability  
 48 during use. Active ingredients used in mouthwashes include Quaternary Ammonium Compounds  
 49 (QACS) such as Dequalinium chloride, benzalkonium chloride, cetyl pyridinium chloride (CPC) and  
 50 chlorhexidine (CHX) which are believed function as antimicrobials via a stepwise process of charge  
 51 mediated attraction and destabilisation of the lipid envelop [9-11].

52 CPC is widely used in mouthwash formulations displaying substantive action against a range of oral  
 53 bacteria [12-14] and viruses, including SARS-CoV-2 [6, 15-17], whilst data on antiviral efficacy of CHX  
 54 against SARS-CoV-2 has been more varied [18-22]. All mouthwashes, regardless of composition, must  
 55 function *in situ* in the oral cavity, and hence must retain efficacy in the presence of human saliva,  
 56 overcoming any potential deactivation from salivary components [23-25].

57 To investigate the impact of formulation composition on efficacy we compared the *in vitro* virucidal  
 58 efficacy of mouthwashes containing 0.07% CPC and 0.2% CHX digluconate against a range of SARS-  
 59 CoV-2 variants. In addition, the efficacy of a representative CPC containing mouthwash was also  
 60 investigated in the presence of human saliva. Our findings suggest CPC mouthwashes offer potent

virucidal activity that is effective against all variants tested and which is maintained in the presence of human saliva under simulated usage conditions.

## Methods

### Cell Culture and Viruses

Vero E6 cells (C1008: African green monkey kidney cells) obtained from Public Health England, were maintained in Dulbecco's minimal essential medium (DMEM) with 10% foetal bovine serum (FBS) and 0.05mg/ml gentamicin. Cells were maintained at 37°C and 5% CO<sub>2</sub>. Passage 5 of SARS-CoV-2 isolate (USA-WA1/2020) and passage 2 or 3 of Alpha (hCoV-19/England/204820464/2020), Beta (hCoV-19/South Africa/KRISP-EC-K005321/2020) and Gamma (hCoV-19/Japan/TY7-503/2021) obtained from BEI Resources [26], were cultured in Vero E6 cells maintained in DMEM with 4% FBS and 0.05mg/ml gentamicin at 37°C and 5% CO<sub>2</sub>. 48 hours post inoculation, virus was harvested and stored at -80°C until used.

### Preparation of Saliva

Stimulated saliva was collected at Unilever Research Port Sunlight, with ethical approval from the Unilever R&D Port Sunlight Independent Ethics Committee (GEN 022 13), collected during November 2019 from 11 donors over 2 days. The saliva was pooled and aliquoted into 250ml samples, and then stored at -20°C until sterilisation. The saliva was sterilised using gamma irradiation (Systagenix, UK, Cobolt 60 turntable, Dose rate 1.2 kGy/hr, minimum dose 32.1 kGy).

## Virus Inactivation

Mouthwash formulations (Table 1 and Figure 1) were assessed following the ASTM International Standard E1052-20 [27]. SARS-CoV-2 titre was calculated for each experiment by plaque assays with the titre consistently  $>4.3\log_{10}$  PFU/mL for USA-WA1/2020 and variants. Briefly, 900  $\mu$ L of mouthwash formulation was added to 100  $\mu$ L of virus suspension, containing 4% FBS and incubated for 30 seconds. After the 30 second incubation, 9mL of Dey and Engley neutralising broth (DE broth) was added and 25 $\mu$ L of the sample was transferred into a dilution series for quantification through a standard plaque assay as previously described .

Table 1. Mouthwash formulations examined for SARS-CoV-2 inactivation.

| Treatment                                         | Code    |
|---------------------------------------------------|---------|
| 0.07% CPC with flavour and mix of herbal extracts | MW-A    |
| 0.07% CPC with flavour                            | MW-B    |
| 0.2% CHX digluconate with flavour                 | MW-C    |
| 70% ethanol in distilled water                    | Control |

Cetyl pyridinium chloride

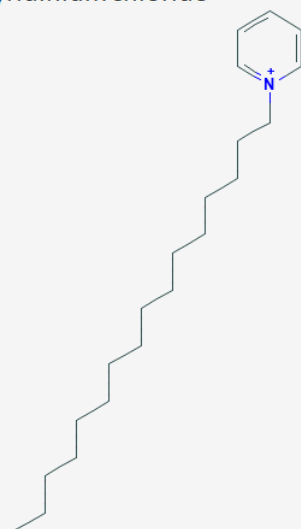

Chlorhexidine

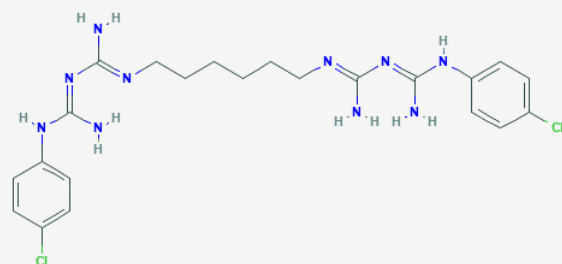

**Figure 1.** Structures of cetyl pyriminium chloride (CPC) and chlorhexidine (CHX).

To assess if human saliva alters the effectiveness of CPC mouthwash, 800 µL of MW-B mouthwash formula was added to 100 µL of human saliva mixed with 100 µL of SARS-CoV-2 (USA-WA1/2020) inoculum. The solution was incubated for 30 seconds and 9 mL of DE broth added. As a control, 800 µL of MW-B mouthwash formula was added to 100 µL of sterile water and 100 µL of virus inoculum, with 9 mL of DE broth added after 30 seconds of incubation. Experiments were carried out in duplicate.

Saliva, neutralisation, and cytotoxicity assays

To assess if human saliva has inherent antiviral action against SARS-CoV-2 (USA-WA1/2020), 100 µL of virus inoculum was added to either 800 µL of sterile water and 100 µL of irradiated human saliva (dilute saliva), or 900 µL of irradiated human saliva (neat saliva) for a 5-minute incubation. After 5 minutes had elapsed, a 25 µL sample was placed into a dilution series. Neutralisation controls were carried out by adding 9 mL of DE broth to 900 µL of mouthwash formula. To this, 100 µL of virus suspension was added for 30 seconds and 25 µL removed to a dilution series and a standard plaque assay performed. To determine the cytotoxicity of the mouthwashes, 100 µL of 4% DMEM was added to 900 µL of test mouthwash formula for 30 seconds. To this 9 mL of DE broth was added and 25 µL placed into dilution series for a standard plaque assay. 25 µL samples from each condition were serially diluted 10-fold to be quantified through a standard plaque assay. Plaques were counted to determine viral titre. All experiments were carried out in triplicate.

## Results

### Comparison of CPC and CHX containing mouthwashes

We tested the ability of CPC and CHX to inactivate SARS-CoV-2 (USA-WA1/2020). Following a 30 second incubation in the presence of the test mouthwashes a reduction in viral titre of  $\geq 4.0 \log_{10}$  PFU/mL was observed with MW-A and MW-B and of  $< 2.0 \log_{10}$  PFU/mL for MW-C. No reduction of viral titre occurred in the water control and however complete inactivation was observed by the 70% ethanol control. All treatments were effectively neutralised by the addition of DE broth (Figure 2). Cytotoxicity assays were able to determine the limit of detection (LOD) for this assay. The LOD is the point at which Vero E6 cell death is due to cytotoxicity of mouthwashes rather than SARS-CoV-2. For all three mouthwashes presented here, cytopathic effect was observed at  $2.0 \log_{10}$  PFU/mL.

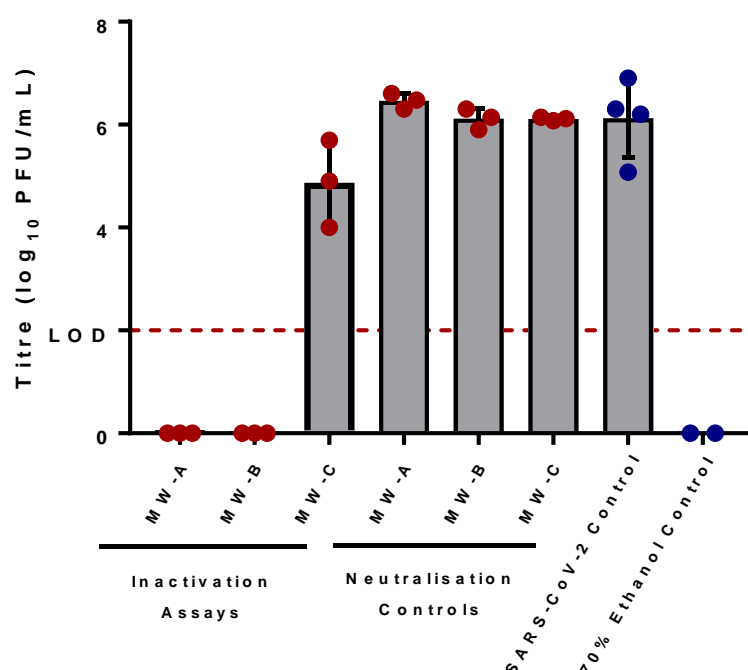

**Figure 2.** Mouthwash formulas were tested for antiviral action against SARS-CoV-2. Mouthwashes were incubated with SARS-CoV-2 inoculum for 30 seconds. Both MW-A and MW-B reduced to below the limit of detection (LOD), while MW-C reduced viral titre by  $1.26 \log_{10}$  PFU/mL compared to the water control. LOD =  $2.0 \log_{10}$  PFU/mL. Viral titres recovered from the water control averaged

6.12log<sub>10</sub> PFU/mL, while viral titre recovered from neutralisation controls were within 1.0log<sub>10</sub> PFU/mL indicating all antiviral activity occurred within 30 seconds of incubation. LOD (2.0log<sub>10</sub> PFU/mL) is shown across the graph with a dotted red line. Error bars represent standard deviation, while red dots are experimental data values and blue dots control values.

## Inactivation of SARS-CoV-2 Variants by Test Products

We also tested the ability of CPC and CHX to inactivate SARS-CoV-2 variants of concern, Alpha, Beta and Gamma. Following the 30second incubation of Alpha with MW-A and MW-B an average reduction of 3.11log<sub>10</sub> PFU/mL to below the LOD was seen. Incubation of Beta with test products saw an average reduction of 4.1log<sub>10</sub> PFU/mL, whilst Gamma saw an average reduction of 3.36log<sub>10</sub> PFU/mL, both to below the LOD (Table 1). In assays carried out with the variants, no reduction was seen in the water control and reduction below the LOD was seen in the 70% ethanol control. The ability to achieve a 4.0log<sub>10</sub> PFU/mL in the variant assays was dependent on titres of SARS-CoV-2 variants following standard propagation methods.

**Table 1.** Mouthwash formulas that were proven to work against SARS-CoV-2 (USA-WA1/2020) were then tested against Alpha, Beta, and Gamma variants of SARS-CoV-2. Both MW-A and MW-B were able to reduce the viral titre of all three variants to below the limit of detection (2.0log<sub>10</sub> PFU/mL) within 30 seconds.

| Variant | Pango lineage | Average Titre (Log <sub>10</sub> PFU/mL) Reduction |      |             |
|---------|---------------|----------------------------------------------------|------|-------------|
|         |               | MW-A                                               | MW-B | 70% Ethanol |
| Alpha   | B.1.1.7       | 3.11                                               | 3.11 | 3.11        |
| Beta    | B.1.351       | 4.11                                               | 4.11 | 4.11        |
| Gamma   | P.1           | 3.36                                               | 3.36 | 3.36        |

## Testing in presence of human saliva

Under normal usage mouthwashes must be functional in the presence of human saliva, hence investigations were undertaken to assess whether saliva displays any measurable endogenous antiviral activity against SARS-CoV-2 (USA-WA1/2020) or whether it acts as an inhibitory “soil” quenching the antiviral function of mouthwash formulations. The endogenous antiviral activity of neat and dilute human saliva was measured over a contact time of 5 minutes (Figure 3A) during which no



significant reduction in viral load was observed compared to the water control. Viral titres of  $5.70\log_{10}$  PFU/mL,  $5.61\log_{10}$  PFU/mL and  $5.45\log_{10}$  PFU/mL were recovered from the neat saliva, dilute saliva incubation and the water control, respectively. It is essential that mouthwashes maintain efficacy in the presence of human saliva. To investigate this, we examined if the antiviral efficacy of MW-B was altered by saliva. We found that MW-B was still capable of inactivation of SARS-CoV-2 to below the LOD in the presence of saliva, indicating that CPC retained efficacy despite the soil load.

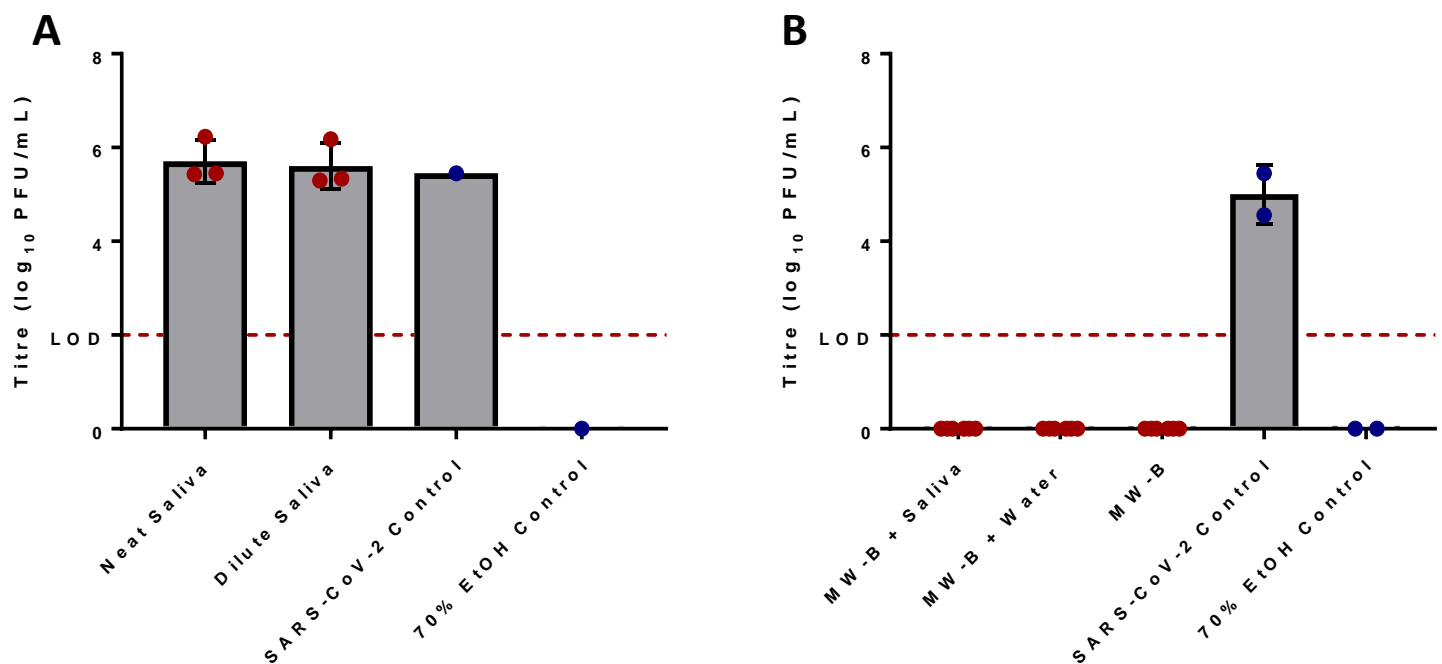

**Figure 3.** Irradiated human saliva has no effect upon the viral titre of SARS-CoV-2 as compared to the water control after incubation with inoculum for 5 minutes. Neat saliva had a ratio of 8 parts water to 1-part irradiated human saliva to 1-part virus inoculum, while dilute saliva had a ratio 9 parts irradiated human saliva to 1-part virus inoculum (A). Human saliva does not inhibit the antiviral activity of mouthwash formulas proven to reduce the titre of SARS-CoV-2 (B). MW-B was able to reduce viral titre to below the LOD both in the presence of irradiated human saliva and without. Human saliva was added in a ratio of 8 parts MW-B to 1-part irradiated human saliva to 1-part virus inoculum. Limit of detection (LOD) ( $2.0\log_{10}$  PFU/mL) is shown across both graphs with a dotted red line. Error bars represent standard deviation, while red dots are experimental data values and blue dots control values.

## Discussion

Our results confirm that mouthwash formulations containing 0.07% CPC, inactivate SARS-CoV-2 by up to 99.99%, representing a value below the LOD after a contact time of 30 seconds. In contrast, within the same experiment, a mouthwash containing CHX (0.2% chlorhexidine gluconate), exhibited poorer virucidal activity against SARS-CoV-2. Our observations are consistent with others, where a number of different CPC mouthwash formulations have been shown to effectively inactivate SARS-CoV-2 *in vitro*, whereas CHX containing mouthwashes are reported to have modest ability to inactivate SARS-CoV-2 [6, 19, 21]. The virucidal action of CPC mouthwash was maintained in the presence of whole human saliva, consistent with human clinical trials which report that rinsing with CPC mouthwash can lower SARS-CoV-2 salivary count for several hours after use [7, 28].

Over the course of the global pandemic, several SARS-CoV-2 variants have emerged with mutations changing the amino acid sequence of the receptor-binding domain of the spike protein [29]. Three variants of concern; Alpha, Beta, and Gamma [30] were effectively inactivated within 30 seconds by both 0.7% CPC mouthwashes, with a reduction in viral titre below the LOD and equivalent to the 70% ethanol control. As the CPC molecule disrupts the viral lipid envelope and the membrane is unchanged by mutations, our data supports the likely efficacy of CPC mouthwash in reducing viral load irrespective of the SARS-CoV-2 variant. Recently the oral cavity has been proposed to have a direct role in COVID-19 disease severity based on a proposed oral-vasculo-pulmonary infection route. Poor oral hygiene with plaque build-up, subsequent gingivitis and periodontitis facilitates direct entry of the virus via the oral gingival sulcus and periodontal pockets enabling infection of the circulatory system and lungs [5]. CPC mouthwashes with anti-plaque and virucidal activity against SARS-CoV-2 could have the potential to lower viral count and lessen the risk of severe lung disease in COVID-19 patients.

In conclusion, two mouthwashes containing 0.07% CPC were effective at inactivating SARS-CoV-2, within 30 seconds with greater than  $4.0\log_{10}$  PFU/ml reduction in viral titre. Moreover, virucidal activity of CPC was maintained in the presence of whole human saliva. Both 0.07% CPC mouthwashes were as effective as 70% ethanol against three variants of concern; Alpha, Beta and Gamma suggesting these CPC formulations possess virucidal action against all variants. In contrast, under the same experimental conditions, a mouthwash containing 0.2% chlorhexidine digluconate did not have substantial action against SARS-CoV-2 *in vitro*. Given the ongoing global pandemic, and the recognition of the significance of the oral cavity in infection, transmission, and disease severity, daily use of an effective CPC mouthwash as part of a good oral hygiene routine, could be a low-cost and simple measure to reduce transmission risk and potentially, lower the risk of developing severe forms of COVID-19.

## Declaration of Interests

AG, SM, and MH are employees of Unilever.

## Acknowledgements

Unilever funded this study. EIP and GLH were supported by the EPSRC (V043811/1) and UKRI-BBSRC COVID rolling fund (BB/V017772/1). GLH was also supported by the BBSRC (BB/T001240/1 and BB/V011278/1), a Royal Society Wolfson Fellowship (RSWF\R1\180013), the NIH (R21AI138074), the EPSRC (EP/V043811/1), the UKRI (20197 and 85336), and the NIHR (NIHR2000907). GLH is affiliated to the National Institute for Health Research Health Protection Research Unit (NIHR HPRU) in Emerging and Zoonotic Infections at University of Liverpool in partnership with Public Health England (PHE), in collaboration with Liverpool School of Tropical Medicine and the University of Oxford. GLH is

based at LSTM. The views expressed are those of the author(s) and not necessarily those of the NHS, the NIHR, the Department of Health or Public Health England. USA-WA1/2020 was deposited by the Centre's for Disease Control and Prevention and obtained through BEI Resources. NIAID, NIH: SARS-Related Coronavirus 2, Isolate, NR-52281. B.1.1.7 (hCoV-19/England/204820464/2020) was obtained through BEI Resources, NIAID, NIH: SARS-Related Coronavirus 2, Isolate hCoV-19/England/204820464/2020, NR-54000, contributed by Bassam Hallis. B.1.351 (hCoV-19/South Africa/KRISP-EC-K005321/2020) was obtained through BEI Resources, NIAID, NIH: SARS-Related Coronavirus 2, Isolate hCoV-19/South Africa/KRISP-EC-K005321/2020, NR-54008, contributed by Alex Sigal and Tulio de Oliveira. P.1 (hCoV-19/Japan/TY7-503/2021) was obtained through BEI Resources, NIAID, NIH: SARS-Related Coronavirus 2, Isolate hCoV-19/Japan/TY7-503/2021 (Brazil P.1), NR-54982, contributed by National Institute of Infectious Diseases.

## References

1. Li Y, Ren B, Peng X, Hu T, Li J, Gong T, et al. Saliva is a non-negligible factor in the spread of COVID-19. *Molecular Oral Microbiology*. 2020;35(4):141-5. doi: <https://doi.org/10.1111/omi.12289>.
2. World Health O. Modes of transmission of virus causing COVID-19: implications for IPC precaution recommendations: scientific brief, 29 March 2020. Geneva: World Health Organization, 2020. Report No.: Contract No.: WHO/2019-nCoV/Sci\_Brief/Transmission\_modes/2020.2.
3. To KK, Tsang OT, Yip CC, Chan KH, Wu TC, Chan JM, et al. Consistent Detection of 2019 Novel Coronavirus in Saliva. *Clinical infectious diseases : an official publication of the Infectious Diseases Society of America*. 2020;71(15):841-3. Epub 2020/02/13. doi: 10.1093/cid/ciaa149. PubMed PMID: 32047895; PubMed Central PMCID: PMC7108139.
4. Huang N, Pérez P, Kato T, Mikami Y, Okuda K, Gilmore RC, et al. SARS-CoV-2 infection of the oral cavity and saliva. *Nature Medicine*. 2021. doi: 10.1038/s41591-021-01296-8.
5. Lloyd-Jones G, Molayem S, Cruvinel Pontes C, Chapple I. The COVID-19 Pathway: A Proposed Oral-Vascular-Pulmonary Route of SARS-CoV-2 Infection and the Importance of Oral Healthcare Measures. *Journal of Oral Medicine and Dental Research*. 2021;2(1):1-23.
6. Statkute E, Rubina A, O'Donnell VB, Thomas DW, Stanton RJ. Brief Report: The Virucidal Efficacy of Oral Rinse Components Against SARS-CoV-2 In Vitro. *bioRxiv*. 2020:2020.11.13.381079. doi: 10.1101/2020.11.13.381079.
7. Eduardo FdP, Corrêa L, Heller D, Daep CA, Benitez C, Malheiros Z, et al. Salivary SARS-CoV-2 load reduction with mouthwash use: A randomized pilot clinical trial. *Heliyon*. 2021;7(6):e07346-e. Epub 2021/06/18. doi: 10.1016/j.heliyon.2021.e07346. PubMed PMID: 34189331.

8. Burton MJ, Clarkson JE, Goulao B, Glennly AM, McBain AJ, Schilder AG, et al. Antimicrobial mouthwashes (gargling) and nasal sprays administered to patients with suspected or confirmed COVID-19 infection to improve patient outcomes and to protect healthcare workers treating them. The Cochrane database of systematic reviews. 2020;9:CD013627. Epub 2020/09/17. doi: 10.1002/14651858.CD013627.pub2. PubMed PMID: 32936948.
9. McDonnell G, Russell AD. Antiseptics and disinfectants: activity, action, and resistance. Clinical microbiology reviews. 1999;12(1):147-79. Epub 1999/01/09. PubMed PMID: 9880479; PubMed Central PMCID: PMCPMC88911.
10. Gilbert P, Moore LE. Cationic antiseptics: diversity of action under a common epithet. Journal of applied microbiology. 2005;99(4):703-15. Epub 2005/09/16. doi: 10.1111/j.1365-2672.2005.02664.x. PubMed PMID: 16162221.
11. Salton MR. Lytic agents, cell permeability, and monolayer penetrability. The Journal of general physiology. 1968;52(1):227-52. Epub 1968/07/01. PubMed PMID: 19873623; PubMed Central PMCID: PMCPMC2225791.
12. Teng F, He T, Huang S, Bo CP, Li Z, Chang JL, et al. Cetylpyridinium chloride mouth rinses alleviate experimental gingivitis by inhibiting dental plaque maturation. International journal of oral science. 2016;8(3):182-90. Epub 2016/09/30. doi: 10.1038/ijos.2016.18. PubMed PMID: 27680288; PubMed Central PMCID: PMCPMC5113089.
13. Kozak KM, Gibb R, Dunavent J, White DJ. Efficacy of a high bioavailable cetylpyridinium chloride mouthrinse over a 24-hour period: a plaque imaging study. American journal of dentistry. 2005;18 Spec No:18a-23a. Epub 2005/09/24. PubMed PMID: 16178132.
14. Cummins D, Creeth JE. Delivery of antiplaque agents from dentifrices, gels, and mouthwashes. Journal of dental research. 1992;71(7):1439-49. Epub 1992/07/01. doi: 10.1177/00220345920710071601. PubMed PMID: 1629461.
15. O'Donnell VB, Thomas D, Stanton R, Maillard JY, Murphy RC, Jones SA, et al. Potential Role of Oral Rinses Targeting the Viral Lipid Envelope in SARS-CoV-2 Infection. Function (Oxford, England). 2020;1(1):zqaa002. Epub 2020/11/21. doi: 10.1093/function/zqaa002. PubMed PMID: 33215159; PubMed Central PMCID: PMCPMC7239187.
16. Baker N, Williams AJ, Tropsha A, Ekins S. Repurposing Quaternary Ammonium Compounds as Potential Treatments for COVID-19. Pharmaceutical research. 2020;37(6):104. Epub 2020/05/27. doi: 10.1007/s11095-020-02842-8. PubMed PMID: 32451736; PubMed Central PMCID: PMCPMC7247743.
17. Muñoz-Basagoiti J, Perez-Zsolt D, León R, Blanc V, Raich-Regué D, Cano-Sarabia M, et al. Mouthwashes with CPC Reduce the Infectivity of SARS-CoV-2 Variants In Vitro. Journal of dental research. 0(0):00220345211029269. doi: 10.1177/00220345211029269. PubMed PMID: 34282982.
18. Xu C, Wang A, Hoskin ER, Cugini C, Markowitz K, Chang TL, et al. Differential Effects of Antiseptic Mouth Rinses on SARS-CoV-2 Infectivity In Vitro. Pathogens (Basel, Switzerland). 2021;10(3). Epub 2021/04/04. doi: 10.3390/pathogens10030272. PubMed PMID: 33804294; PubMed Central PMCID: PMCPMC8001756.
19. Davies K, Buczkowski H, Welch SR, Green N, Mawer D, Woodford N, et al. Effective *in-vitro* inactivation of SARS-CoV-2 by commercially available mouthwashes. bioRxiv. 2020:2020.12.02.408047. doi: 10.1101/2020.12.02.408047.
20. Koch-Heier J, Hoffmann H, Schindler M, Lussi A, Planz O. Inactivation of SARS-CoV-2 through Treatment with the Mouth Rinsing Solutions ViruProX(®) and BacterX(®) Pro. Microorganisms. 2021;9(3). Epub 2021/04/04. doi: 10.3390/microorganisms9030521. PubMed PMID: 33802603; PubMed Central PMCID: PMCPMC8002120.
21. Komine A, Yamaguchi E, Okamoto N, Yamamoto K. Virucidal activity of oral care products against SARS-CoV-2 in vitro. Journal of oral and maxillofacial surgery, medicine, and pathology. 2021. Epub 2021/03/02. doi: 10.1016/j.ajoms.2021.02.002. PubMed PMID: 33643836; PubMed Central PMCID: PMCPMC7898974.

22. Meister TL, Brüggemann Y, Todt D, Conzelmann C, Müller JA, Groß R, et al. Virucidal Efficacy of Different Oral Rinses Against Severe Acute Respiratory Syndrome Coronavirus 2. *J Infect Dis*. 2020;222(8):1289-92. Epub 2020/07/30. doi: 10.1093/infdis/jiaa471. PubMed PMID: 32726430; PubMed Central PMCID: PMC7454736.
23. Kulkarni B, Wood K, Mattes R. Quantitative and qualitative analyses of human salivary NEFA with gas-chromatography and mass spectrometry. *Frontiers in Physiology*. 2012;3(328). doi: 10.3389/fphys.2012.00328.
24. Chen Z, Feng S, Pow EH, Lam OL, Mai S, Wang H. Organic anion composition of human whole saliva as determined by ion chromatography. *Clinica chimica acta; international journal of clinical chemistry*. 2015;438:231-5. Epub 2014/09/03. doi: 10.1016/j.cca.2014.08.027. PubMed PMID: 25181611.
25. Garcia-Godoy F, Klukowska MA, Zhang YH, Anastasia K, Cheng R, Gabbard M, et al. Comparative bioavailability and antimicrobial activity of cetylpyridinium chloride mouthrinses in vitro and in vivo. *American journal of dentistry*. 2014;27(4):185-90. Epub 2015/04/04. PubMed PMID: 25831600.
26. Harcourt J, Tamin A, Lu X, Kamili S, Sakthivel SK, Murray J, et al. Severe Acute Respiratory Syndrome Coronavirus 2 from Patient with Coronavirus Disease, United States. *Emerging infectious diseases*. 2020;26(6):1266-73. Epub 2020/03/12. doi: 10.3201/eid2606.200516. PubMed PMID: 32160149; PubMed Central PMCID: PMC7258473.
27. ASTM. ASTM International E1052-20, Standard Practice to Assess the Activity of Microbicides against Viruses in Suspension. West Conshohocken, PA, 2020.
28. Seneviratne CJ, Balan P, Ki KKK, Udawatte NS, Lai D, Lin DNH, et al. Efficacy of commercial mouth-rinses on SARS-CoV-2 viral load in saliva: Randomized Control Trial in Singapore. *medRxiv*. 2020:2020.09.14.20186494. doi: 10.1101/2020.09.14.20186494.
29. Harvey WT, Carabelli AM, Jackson B, Gupta RK, Thomson EC, Harrison EM, et al. SARS-CoV-2 variants, spike mutations and immune escape. *Nature Reviews Microbiology*. 2021;19(7):409-24. doi: 10.1038/s41579-021-00573-0.
30. Konings F, Perkins MD, Kuhn JH, Pallen MJ, Alm EJ, Archer BN, et al. SARS-CoV-2 Variants of Interest and Concern naming scheme conducive for global discourse. *Nature Microbiology*. 2021;6(7):821-3. doi: 10.1038/s41564-021-00932-w.
